# Supplementary material for: Fidelity to and comparative results across behavioral interventions evaluated through the RE-AIM framework: a systematic review
Source: Springer Nature journal article supplement (doi:10.1186/s13643-015-0141-0), 2015-11-06
Supplement: MOESM1 [file 9787608]

**Additional file 1.** Eligibility criteria for articles.

| <b>Data type</b> | <b>Inclusion criteria</b>                                                                                                                                                                                      |
|------------------|----------------------------------------------------------------------------------------------------------------------------------------------------------------------------------------------------------------|
| RE-AIM           | <ul style="list-style-type: none"><li>· State the use of any RE-AIM dimension</li><li>· Use RE-AIM in empirical and evaluation purposes</li></ul>                                                              |
| Language         | <ul style="list-style-type: none"><li>· English</li></ul>                                                                                                                                                      |
| Study design     | <ul style="list-style-type: none"><li>· Used experimental or quasi-experimental design</li></ul>                                                                                                               |
| Assessments      | <ul style="list-style-type: none"><li>· Must include data on at least one RE-AIM dimension</li></ul>                                                                                                           |
| Date ranges      | <ul style="list-style-type: none"><li>· 1999 to April 2013</li></ul>                                                                                                                                           |
|                  |                                                                                                                                                                                                                |
| <b>Excluded</b>  | <ul style="list-style-type: none"><li>· Commentary</li><li>· Theoretical papers</li><li>· Published abstracts</li><li>· Dissertations</li><li>· Book chapters</li><li>· Editorials</li><li>· Reviews</li></ul> |
