# Supplementary material for: Fidelity to and comparative results across behavioral interventions evaluated through the RE-AIM framework: a systematic review
Source: Springer Nature journal article supplement (doi:10.1186/s13643-015-0141-0), 2015-11-06
Supplement: MOESM4 [file 9787608]

**Additional file 4 . Summary of all included RE-AIM studies (N=101)**

| Title                                                                                                                                       | First Author | Year | Country | Target Population                          | Study Setting                                                                        | Study Design  | Methods Used  | Level of Analysis | Reach Assessed? * | Reach Intervened? + | Effectiveness Assessed? * | Effectiveness Intervened? + | Adoption Assessed? * | Adoption Intervened? + | Implementation Assessed? * | Implementation Intervened? + | Maintenance(I)_Assessed? * | Maintenance(I)_Intervened? + | Maintenance(O)_Assessed? * | Maintenance(O)_Intervened? + | Outcome               |
|---------------------------------------------------------------------------------------------------------------------------------------------|--------------|------|---------|--------------------------------------------|--------------------------------------------------------------------------------------|---------------|---------------|-------------------|-------------------|---------------------|---------------------------|-----------------------------|----------------------|------------------------|----------------------------|------------------------------|----------------------------|------------------------------|----------------------------|------------------------------|-----------------------|
|                                                                                                                                             |              |      |         |                                            |                                                                                      |               |               |                   | Y                 | D                   | Y                         | C                           | Y                    | D                      | Y                          | D                            | N                          | N                            | Y                          | D                            |                       |
| A 3-month jump-landing training program: A feasibility study using the RE-AIM framework                                                     | Aerts        | 2013 | Belgium | Basketball players in Belgium              | Second highest national level and regional basketball leagues                        | RCT           | Mixed Methods | IWS               | Y                 | D                   | Y                         | C                           | Y                    | D                      | Y                          | D                            | N                          | N                            | Y                          | D                            | Injury prevention     |
| Promoting fruit and vegetable consumption among members of black churches, Michigan and North Carolina, 2008-2010                           | Allicock     | 2013 | U.S.    | African American churches/ church members  | North Carolina and Michigan churches                                                 | RCT           | Mixed Methods | IWS               | Y                 | D                   | Y                         | C                           | Y                    | D                      | Y                          | D                            | Y                          | D                            | Y                          | D                            | Dietary               |
| Evaluation of a pilot training program in alcohol screening, brief intervention, and referral to treatment for nurses in inpatient settings | Broyles      | 2013 | U.S.    | Nurses at a VA hospital                    | Large academic medical center affiliated with the US. Department of Veterans Affairs | RCT           | Mixed Methods | I                 | Y                 | D                   | Y                         | D                           | Y                    | D                      | Y                          | D                            | N                          | N                            | Y                          | D                            | Substance abuse       |
| Sustained use of a tool for lifestyle intervention implemented in primary health care: a 2-year follow-up.                                  | Carifjord    | 2013 | Sweden  | Providers in Swedish primary care settings | Swedish primary health care settings                                                 | Translational | Quantitative  | S                 | Y                 | D                   | Y                         | C                           | Y                    | C                      | Y                          | D                            | Y                          | D                            | N                          | N                            | No individual outcome |





**Appendix D.** Summary of all included RE-AIM studies (N=101)

| Title                                                                                                                                                                             | First Author | Year | Country | Target Population                          | Study Setting                                   | Study Design  | Methods Used  | Level of Analysis | Reach Assessed? * | Reach Intervened? + | Effectiveness Assessed? * | Effectiveness Intervened? + | Adoption Assessed? * | Adoption Intervened? + | Implementation Assessed? * | Implementation Intervened? + | Maintenance(I)_Assessed? * | Maintenance(I)_Intervened? + | Maintenance(O)_Assessed? * | Maintenance(O)_Intervened? + | Outcome                |
|-----------------------------------------------------------------------------------------------------------------------------------------------------------------------------------|--------------|------|---------|--------------------------------------------|-------------------------------------------------|---------------|---------------|-------------------|-------------------|---------------------|---------------------------|-----------------------------|----------------------|------------------------|----------------------------|------------------------------|----------------------------|------------------------------|----------------------------|------------------------------|------------------------|
|                                                                                                                                                                                   |              |      |         |                                            |                                                 |               |               |                   | Y                 | N                   | Y                         | N                           | Y                    | N                      | Y                          | N                            | Y                          | N                            | Y                          | N                            | Y                      |
| Applying the RE-AIM framework to evaluate two implementation strategies used to introduce a tool for lifestyle intervention in Swedish primary health care                        | Carljford    | 2012 | Sweden  | Providers in Swedish primary care settings | Swedish primary health care settings            | Translational | Quantitative  | S                 | M                 | D                   | M                         | C                           | M                    | C                      | Y                          | C                            | N                          | N                            | N                          | N                            | No individual outcome  |
| Adoption, reach and effectiveness of computer-based, practitioner delivered and combined smoking interventions in general medical practices: A three-arm cluster randomized trial | Christian    | 2012 | Germany | Adult smoking patients                     | General medical practices in north-east Germany | RCT           | Quantitative  | I&S               | Y                 | C                   | Y                         | C                           | Y                    | C                      | Y                          | D                            | N                          | N                            | N                          | N                            | Substance              |
| Motivational interviewing training to promote Head Start children's adherence to oral health care recommendations: Results of a program evaluation                                | Cook         | 2012 | U.S.    | Head Start children                        | Head Start schools                              | Pre-post      | Quantitative  | I                 | 3                 | D                   | M                         | D                           | Y                    | D                      | Y                          | C                            | N                          | N                            | Y                          | D                            | Oral health care       |
| State-wide dissemination of a school-based nutrition education programme: A RE-AIM (Reach, Efficacy, Adoption, Implementation, Maintenance) analysis                              | Dunton       | 2012 | U.S.    | 3rd grade students & teachers              | 22 public elementary schools in California      | RCT           | Quantitative  | I                 | Y                 | D                   | Y                         | D                           | Y                    | D                      | Y                          | D                            | Y                          | D                            | Y                          | D                            | No individual outcomes |
| Evaluating the implementation of a hospital work-site obesity prevention intervention: Applying the RE-AIM framework                                                              | Estabrook    | 2012 | U.S.    | Hospital workers                           | Worksite                                        | RCT           | Mixed Methods | S                 | Y                 | D                   | Y                         | C                           | Y                    | D                      | Y                          | D                            | M                          | D                            | Y                          | D                            | Multiple Outcomes      |

**Appendix D.** Summary of all included RE-AIM studies (N=101)

| Title                                                                                                                                                  | First Author | Year | Country | Target Population                       | Study Setting                                                     | Study Design       | Methods Used  | Level of Analysis | Reach Assessed? * | Reach Intervened? + | Effectiveness Assessed? * | Effectiveness Intervened? + | Adoption Assessed? * | Adoption Intervened? + | Implementation Assessed? * | Implementation Intervened? + | Maintenance(I)_Assessed? * | Maintenance(I)_Intervened? + | Maintenance(O)_Assessed? * | Maintenance(O)_Intervened? + | Outcome               |
|--------------------------------------------------------------------------------------------------------------------------------------------------------|--------------|------|---------|-----------------------------------------|-------------------------------------------------------------------|--------------------|---------------|-------------------|-------------------|---------------------|---------------------------|-----------------------------|----------------------|------------------------|----------------------------|------------------------------|----------------------------|------------------------------|----------------------------|------------------------------|-----------------------|
|                                                                                                                                                        |              |      |         |                                         |                                                                   |                    |               |                   | Y                 | D                   | N                         | N                           | N                    | N                      | N                          | N                            | N                          | N                            | N                          | N                            | N                     |
| Calculating reach of evidence-based weight loss and memory improvement interventions among older adults attending Arkansas senior centers              | Felix        | 2012 | U.S.    | Arkansas seniors                        | Senior centers                                                    | RCT                | Quantitative  | I                 | Y                 | D                   | N                         | N                           | N                    | N                      | N                          | N                            | N                          | N                            | N                          | N                            | Weight                |
| Implementation outcomes of evidence-based quality improvement for depression in VA community based outpatient clinics                                  | Fortney      | 2012 | U.S.    | Veterans                                | 3 VA medical centers and their community-based Outpatient clinics | Quasi experimental | Quantitative  | I&S               | Y                 | D                   | Y                         | C                           | Y                    | C                      | Y                          | C                            | N                          | N                            | Y                          | D                            | No individual outcome |
| 12-month outcomes of an internet-based diabetes self-management support program                                                                        | Glasgow      | 2012 | U.S.    | Adults                                  | Primary care clinics                                              | RCT                | Quantitative  | I                 | Y                 | D                   | Y                         | C                           | N                    | N                      | N                          | N                            | Y                          | B                            | N                          | N                            | Multiple outcomes     |
| Processes and outcomes of developing a continuity of care document for use as a personal health record by people living with HIV/AIDS in New York City | Gordon       | 2012 | U.S.    | People living with HIV in New York City | New York Presbyterian System Select Health                        | Translational      | Mixed Methods | I&S               | Y                 | D                   | Y                         | C                           | Y                    | D                      | Y                          | C                            | N                          | N                            | Y                          | D                            | No individual outcome |

**Appendix D.** Summary of all included RE-AIM studies (N=101)

| Title                                                                                                                                                                 | First Author | Year | Country   | Target Population                                                                                                                           | Study Setting                                                                                                                                                 | Study Design             | Methods Used  | Level of Analysis | Reach Assessed? * | Reach Intervened? + | Effectiveness Assessed? * | Effectiveness Intervened? + | Adoption Assessed? * | Adoption Intervened? + | Implementation Assessed? * | Implementation Intervened? + | Maintenance(I)_Assessed? * | Maintenance(I)_Intervened? + | Maintenance(O)_Assessed? * | Maintenance(O)_Intervened? + | Outcome               |
|-----------------------------------------------------------------------------------------------------------------------------------------------------------------------|--------------|------|-----------|---------------------------------------------------------------------------------------------------------------------------------------------|---------------------------------------------------------------------------------------------------------------------------------------------------------------|--------------------------|---------------|-------------------|-------------------|---------------------|---------------------------|-----------------------------|----------------------|------------------------|----------------------------|------------------------------|----------------------------|------------------------------|----------------------------|------------------------------|-----------------------|
|                                                                                                                                                                       |              |      |           |                                                                                                                                             |                                                                                                                                                               |                          |               |                   |                   |                     |                           |                             |                      |                        |                            |                              |                            |                              |                            |                              |                       |
| Circles of Care: Development and initial evaluation of a peer support model for African-Americans with advanced cancer                                                | Hanson       | 2012 | U.S.      | African-Americans with advanced cancer/serious illness living in three-county area of central North Carolina, Lay health volunteer advisors | Community (faith-based, cancer-support, community service organizations and African-American fraternities, sororities and local student health service clubs) | Observational evaluation | Mixed Methods | I&S               | M                 | D                   | N                         | N                           | M                    | C                      | Y                          | D                            | N                          | N                            | N                          | N                            | No individual outcome |
| The GLAMA (Girls! Lead! Achieve! Mentor! Activate!) physical activity and peer leadership intervention pilot project: A process evaluation using the RE-AIM framework | Jenkison     | 2012 | Australia | Teachers, school, and students (girls only)                                                                                                 | One rural secondary school in Australia                                                                                                                       | Process evaluation       | Mixed Methods | I&S               | Y                 | D                   | M                         | C                           | Y                    | D                      | Y                          | C                            | N                          | N                            | N                          | N                            | Physical activity     |
| Application of the RE-AIM framework to evaluate the impact of a worksite-based financial incentive intervention for smoking cessation                                 | Kim          | 2012 | U.S.      | Adult smokers employed at General Electric worksites                                                                                        | Worksite                                                                                                                                                      | RCT & observational      | Mixed Methods | I&S               | Y                 | D                   | Y                         | D                           | Y                    | D                      | Y                          | D                            | N                          | N                            | Y                          | D                            | Substance             |

**Appendix D.** Summary of all included RE-AIM studies (N=101)

| Title                                                                                                                                                                             | First Author | Year | Country     | Target Population                                   | Study Setting                                                                                            | Study Design                      | Methods Used  | Level of Analysis | Reach Assessed? * | Reach Intervened? + | Effectiveness Assessed? * | Effectiveness Intervened? + | Adoption Assessed? * | Adoption Intervened? + | Implementation Assessed? * | Implementation Intervened? + | Maintenance(I)_Assessed? * | Maintenance(I)_Intervened? + | Maintenance(O)_Assessed? * | Maintenance(O)_Intervened? + | Outcome                |
|-----------------------------------------------------------------------------------------------------------------------------------------------------------------------------------|--------------|------|-------------|-----------------------------------------------------|----------------------------------------------------------------------------------------------------------|-----------------------------------|---------------|-------------------|-------------------|---------------------|---------------------------|-----------------------------|----------------------|------------------------|----------------------------|------------------------------|----------------------------|------------------------------|----------------------------|------------------------------|------------------------|
|                                                                                                                                                                                   |              |      |             |                                                     |                                                                                                          |                                   |               |                   | Y                 | D                   | N                         | D                           | Y                    | D                      | N                          | D                            | N                          | D                            | N                          | D                            | N                      |
| Evaluating the impact of patient's online access to doctor's visit notes: Designing and executing the OpenNotes project                                                           | Leveille     | 2012 | U.S.        | Primary care doctors and patients                   | Primary care practices in three diverse health systems Boston, MA, rural Northeastern PA and Seattle, WA | experimental, nonequivalent group | Mixed Methods | I&S               | Y                 | D                   | N                         | D                           | Y                    | D                      | N                          | D                            | N                          | D                            | N                          | N                            | No individual outcomes |
| Adoption, reach and effectiveness of computer-based, practitioner delivered and combined smoking interventions in general medical practices: A three-arm cluster randomized trial | Meyera       | 2012 | Germany     | Adult smoking patients                              | General medical practices                                                                                | RCT                               | Quantitative  | I&S               | Y                 | C                   | Y                         | C                           | Y                    | C                      | Y                          | D                            | N                          | N                            | N                          | N                            | Substance              |
| Successful dissemination of Fun 5 - a physical activity and nutrition program for children                                                                                        | Nigg         | 2012 | U.S.        | Elementary school children in after-school programs | Hawaii after-school settings serving elementary school-aged children                                     | Dissemination                     | Mixed Methods | I&S               | Y                 | D                   | Y                         | C                           | M                    | C                      | Y                          | D                            | N                          | N                            | Y                          | D                            | Multiple Outcomes      |
| Differences in reach and attrition between web-based and print-delivered tailored interventions among adults over 50 years of age: Clustered randomized trial                     | Peele        | 2012 | Netherlands | Adults > 50 yrs. of age                             | Communities in Municipal Health Council                                                                  | RCT                               | Quantitative  | I&S               | Y                 | D                   | Y                         | D                           | Y                    | D                      | N                          | N                            | N                          | N                            | N                          | N                            | Other- Drop Out- Rate  |

**Appendix D.** Summary of all included RE-AIM studies (N=101)

| Title                                                                                                                                                               | First Author | Year | Country | Target Population                                                                                                                                 | Study Setting                                                                                         | Study Design                 | Methods Used  | Level of Analysis | Reach Assessed? * | Reach Intervened? + | Effectiveness Assessed? * | Effectiveness Intervened? + | Adoption Assessed? * | Adoption Intervened? + | Implementation Assessed? * | Implementation Intervened? + | Maintenance(I)_Assessed? * | Maintenance(I)_Intervened? + | Maintenance(O)_Assessed? * | Maintenance(O)_Intervened? + | Outcome                 |
|---------------------------------------------------------------------------------------------------------------------------------------------------------------------|--------------|------|---------|---------------------------------------------------------------------------------------------------------------------------------------------------|-------------------------------------------------------------------------------------------------------|------------------------------|---------------|-------------------|-------------------|---------------------|---------------------------|-----------------------------|----------------------|------------------------|----------------------------|------------------------------|----------------------------|------------------------------|----------------------------|------------------------------|-------------------------|
|                                                                                                                                                                     |              |      |         |                                                                                                                                                   |                                                                                                       |                              |               |                   | Y                 | D                   | N                         | N                           | Y                    | D                      | Y                          | D                            | N                          | N                            | N                          | N                            | N                       |
| Rationale, design, and sample characteristics of a practical randomized trial to assess a weight loss intervention for low-income women: The Weight-Wise II Program | Samuel-Hodge | 2012 | U.S.    | Mid-life low-income women between 40 & 64 years old                                                                                               | Community health departments in North Carolina                                                        | Translational                | Mixed Methods | I&S               | Y                 | D                   | N                         | N                           | Y                    | D                      | Y                          | D                            | N                          | N                            | N                          | N                            | Substance               |
| Implementing an evidence-based caregiver intervention within an integrated healthcare system                                                                        | Stevens      | 2012 | U.S.    | Dementia caregivers                                                                                                                               | Integrated healthcare system (1 hospital & 1 ambulatory internal medicine prim. care clinic) in Texas | Translational implementation | Quantitative  | I&S               | Y                 | D                   | Y                         | C                           | Y                    | D                      | Y                          | D                            | Y                          | D                            | Y                          | D                            | Caregiving              |
| Adapting and RE-AIMing a heart disease prevention program for older women with diabetes                                                                             | Toobert      | 2012 | U.S.    | Older Latina women w/ type 2 diabetes who were at risk for CHD, but do not have CHD; Viva Bien: high risk older Latina women who did not have CHD | Primary care practices in Oregon                                                                      | RCT                          | Quantitative  | I                 | Y                 | D                   | Y                         | C                           | Y                    | D                      | Y                          | D                            | Y                          | C                            | Y                          | C                            | Disease self-management |



**Appendix D.** Summary of all included RE-AIM studies (N=101)

| Title                                                                                                                                                                                       | First Author | Year | Country | Target Population                                            | Study Setting                                                    | Study Design       | Methods Used  | Level of Analysis | Reach Assessed? * | Reach Intervened? + | Effectiveness Assessed? * | Effectiveness Intervened? + | Adoption Assessed? * | Adoption Intervened? + | Implementation Assessed? * | Implementation Intervened? + | Maintenance(I)_Assessed? * | Maintenance(I)_Intervened? + | Maintenance(O)_Assessed? * | Maintenance(O)_Intervened? + | Outcome           |
|---------------------------------------------------------------------------------------------------------------------------------------------------------------------------------------------|--------------|------|---------|--------------------------------------------------------------|------------------------------------------------------------------|--------------------|---------------|-------------------|-------------------|---------------------|---------------------------|-----------------------------|----------------------|------------------------|----------------------------|------------------------------|----------------------------|------------------------------|----------------------------|------------------------------|-------------------|
|                                                                                                                                                                                             |              |      |         |                                                              |                                                                  |                    |               |                   | Y                 | D                   | Y                         | N                           | Y                    | D                      | Y                          | D                            | N                          | N                            | N                          | N                            | N                 |
| Implementation of an inpatient smoking cessation programme in a Veterans Affairs facility                                                                                                   | Vick         | 2012 | U.S.    | Inpatient veteran smokers                                    | General medical practices                                        | RCT                | Quantitative  | I                 | Y                 | D                   | Y                         | N                           | Y                    | D                      | Y                          | D                            | N                          | N                            | N                          | N                            | Dietary           |
| Baseline reach and adoption characteristics in a randomized controlled trial of two weight loss interventions translated into primary care: A structured report of real-world applicability | Yank         | 2012 | U.S.    | Overweight/obese adults with increased cardio-metabolic risk | Primary care clinics                                             | RCT                | Quantitative  | I                 | Y                 | C                   | N                         | N                           | Y                    | D                      | N                          | N                            | N                          | N                            | N                          | N                            | Diabetes          |
| Exploring community gardens in a health disparate population: Findings from a Mixed Methods pilot study                                                                                     | Zoelner      | 2012 | U.S.    | Parents and youths from the Dan River Region                 | Community                                                        | Quasi-experimental | Mixed Methods | S                 | Y                 | D                   | Y                         | D                           | N                    | N                      | Y                          | N                            | Y                          | N                            | M                          | D                            | Diet              |
| Improving prescribing safety in patients with renal insufficiency in the ambulatory setting: the Drug Renal Alert Pharmacy (DRAP) program                                                   | Bhardwaja    | 2011 | U.S.    | Integrated health care system                                | Population based; A large integrated health care delivery system | RCT                | Quantitative  | S                 | Y                 | D                   | Y                         | C                           | Y                    | D                      | Y                          | D                            | Y                          | D                            | Y                          | D                            | Medical adherence |
| Strategies to promote high school students' healthful food choices                                                                                                                          | Bukhari      | 2011 | U.S.    | High school students in Brooklyn, NY                         | High school                                                      | RCT                | Mixed Methods | I                 | Y                 | D                   | Y                         | C                           | Y                    | D                      | Y                          | D                            | N                          | N                            | Y                          | D                            | Dietary           |

**Appendix D.** Summary of all included RE-AIM studies (N=101)

| Title                                                                                                                                                                                                    | First Author | Year | Country | Target Population                                           | Study Setting                                            | Study Design         | Methods Used  | Level of Analysis | Reach Assessed? * | Reach Intervened? + | Effectiveness Assessed? * | Effectiveness Intervened? + | Adoption Assessed? * | Adoption Intervened? + | Implementation Assessed? * | Implementation Intervened? + | Maintenance(I)_Assessed? * | Maintenance(I)_Intervened? + | Maintenance(O)_Assessed? * | Maintenance(O)_Intervened? + | Outcome           |
|----------------------------------------------------------------------------------------------------------------------------------------------------------------------------------------------------------|--------------|------|---------|-------------------------------------------------------------|----------------------------------------------------------|----------------------|---------------|-------------------|-------------------|---------------------|---------------------------|-----------------------------|----------------------|------------------------|----------------------------|------------------------------|----------------------------|------------------------------|----------------------------|------------------------------|-------------------|
|                                                                                                                                                                                                          |              |      |         |                                                             |                                                          |                      |               |                   | Y                 | D                   | Y                         | C                           | N                    | N                      | Y                          | D                            | N                          | N                            | N                          | N                            | N                 |
| Engagement in a diabetes self-management website: usage patterns and generalizability of program use                                                                                                     | Glasgow      | 2011 | U.S.    | Adults w/ T2DM                                              | 5 primary care clinics within Kaiser Permanente Colorado | randomized practical | Quantitative  | I                 | Y                 | D                   | Y                         | C                           | N                    | N                      | Y                          | D                            | N                          | N                            | N                          | N                            | Multiple outcomes |
| RE-AIM evaluation of the Veterans Health Administration's MOVE! weight management program                                                                                                                | Kahwati      | 2011 | U.S.    | VA patients                                                 | All VHA facilities                                       | Translational        | Mixed Methods | I&S               | Y                 | C                   | Y                         | C                           | Y                    | C                      | Y                          | C                            | N                          | N                            | Y                          | C                            | Weight            |
| Why are financial incentives not effective at influencing some smokers to quit? Results of a process evaluation of a worksite trial assessing the efficacy of financial incentives for smoking cessation | Kim          | 2011 | U.S.    | Adult employees at company work sites who smoked cigarettes | Community                                                | RCT                  | Mixed Methods | I                 | N                 | N                   | Y                         | D                           | N                    | N                      | Y                          | D                            | N                          | N                            | N                          | N                            | Substance         |
| Understanding dissemination and implementation of a new intervention in assisted living settings: The case of function-focused care                                                                      | Resnick      | 2011 | U.S.    | Residents of assisted living                                | Assisted living communities                              | RCT                  | Mixed Methods | S                 | M                 | D                   | Y                         | C                           | Y                    | D                      | Y                          | D                            | N                          | N                            | Y                          | B                            | Physical activity |
| Intervention costs and cost-effectiveness for a multiple-risk-factor diabetes self-management trial for Latinas: economic analysis of ¡Viva Bien!                                                        | Ritzwoller   | 2011 | U.S.    | Latinas with T2DM                                           | Primary care clinics                                     | RCT                  | Quantitative  | I                 | Y                 | D                   | Y                         | C                           | N                    | D                      | N                          | N                            | N                          | N                            | N                          | N                            | Multiple outcomes |

**Appendix D.** Summary of all included RE-AIM studies (N=101)

| Title                                                                                                                                                                            | First Author | Year | Country     | Target Population                                       | Study Setting                                                                                         | Study Design                         | Methods Used  | Level of Analysis | Reach Assessed? * | Reach Intervened? + | Effectiveness Assessed? * | Effectiveness Intervened? + | Adoption Assessed? * | Adoption Intervened? + | Implementation Assessed? * | Implementation Intervened? + | Maintenance(I)_Assessed? * | Maintenance(I)_Intervened? + | Maintenance(O)_Assessed? * | Maintenance(O)_Intervened? + | Outcome               |
|----------------------------------------------------------------------------------------------------------------------------------------------------------------------------------|--------------|------|-------------|---------------------------------------------------------|-------------------------------------------------------------------------------------------------------|--------------------------------------|---------------|-------------------|-------------------|---------------------|---------------------------|-----------------------------|----------------------|------------------------|----------------------------|------------------------------|----------------------------|------------------------------|----------------------------|------------------------------|-----------------------|
|                                                                                                                                                                                  |              |      |             |                                                         |                                                                                                       |                                      |               |                   | Y                 | D                   | Y                         | C                           | Y                    | D                      | Y                          | D                            | Y                          | D                            | Y                          | D                            | Y                     |
| RE-AIM evaluation of the alcohol and pregnancy project: Educational resources to inform health professionals about prenatal alcohol exposure and fetal alcohol spectrum disorder | Payne        | 2011 | Australia   | Health professionals in Western Australia               | Dept. of Health, Aboriginal Community Controlled Health Services, & the Australia Medical Association | Quasi-experimental w/o control group | Quantitative  | I                 | M                 | D                   | Y                         | C                           | Y                    | D                      | Y                          | D                            | Y                          | D                            | Y                          | D                            | No individual outcome |
| The impact of disseminating the whole-community project '10,000 Steps': a RE-AIM analysis                                                                                        | Van Acker    | 2011 | Belgium     | Adult citizens living in the Flanders region of Belgium | Community-based                                                                                       | Evaluation of adaptations            | Mixed Methods | I                 | Y                 | D                   | Y                         | D                           | Y                    | D                      | Y                          | D                            | N                          | N                            | Y                          | D                            | Physical Activity     |
| The long-term efficacy of two computer-tailored physical activity interventions for older adults: Main effects and mediators                                                     | van Stralen  | 2011 | Netherlands | Adults 50 years and older                               | Municipal health council region communities in the Netherlands                                        | RCT                                  | Quantitative  | I&S               | Y                 | D                   | Y                         | C                           | Y                    | D                      | Y                          | D                            | Y                          | D                            | N                          | N                            | Physical Activity     |
| Lay health educators translate a weight-loss intervention in senior centers: a randomized controlled trial                                                                       | West         | 2011 | U.S.        | Seniors                                                 | Seniors' centers                                                                                      | RCT                                  | Quantitative  | S                 | Y                 | D                   | Y                         | C                           | Y                    | D                      | Y                          | D                            | N                          | N                            | N                          | N                            | Weight                |
| H.U.B city steps: methods and early findings from a community-based participatory research trial to reduce blood pressure among African Americans                                | Zoellner     | 2011 | U.S.        | African American adults in low-income Southern state    | Community                                                                                             | Quasi-experimental                   | Mixed Methods | I                 | Y                 | C                   | Y                         | C                           | Y                    | D                      | Y                          | D                            | N                          | N                            | N                          | N                            | Quality of life       |

**Appendix D.** Summary of all included RE-AIM studies (N=101)

| Title                                                                                                                                   | First Author | Year | Country     | Target Population                                  | Study Setting                                                                                                                                              | Study Design              | Methods Used | Level of Analysis | Reach Assessed? * |   | Reach Intervened? + |   | Effectiveness Assessed? * |   | Effectiveness Intervened? + |   | Adoption Assessed? * |   | Adoption Intervened? + |   | Implementation Assessed? * |   | Implementation Intervened? + |   | Maintenance(I)_Assessed? * |   | Maintenance(I)_Intervened? + |   | Maintenance(O)_Assessed? * |   | Maintenance(O)_Intervened? + |   | Outcome |
|-----------------------------------------------------------------------------------------------------------------------------------------|--------------|------|-------------|----------------------------------------------------|------------------------------------------------------------------------------------------------------------------------------------------------------------|---------------------------|--------------|-------------------|-------------------|---|---------------------|---|---------------------------|---|-----------------------------|---|----------------------|---|------------------------|---|----------------------------|---|------------------------------|---|----------------------------|---|------------------------------|---|----------------------------|---|------------------------------|---|---------|
|                                                                                                                                         |              |      |             |                                                    |                                                                                                                                                            |                           |              |                   | Y                 | D | Y                   | D | Y                         | C | Y                           | D | Y                    | D | Y                      | C | Y                          | D | Y                            | C | Y                          | D | Y                            | D | Y                          | C | Y                            | D |         |
| Evaluating an insurance-sponsored weight management program with the RE-AIM model, West Virginia, 2004-2008                             | Abidso       | 2010 | U.S.        | Obese adults covered by the insurance agency       | 31 fitness facilities: 2 in university cardiac rehab/exercise labs, 2 in physical therapy facilities, 5 in hospitals & 22 private wellness/fitness centers | Program evaluation        | Quantitative | I&S               | Y                 | D | Y                   | C | Y                         | D | Y                           | D | Y                    | C | Y                      | D | Y                          | C | Y                            | D | Y                          | D | Y                            | D | Y                          | D | Multiple outcomes            |   |         |
| From research to practice: EnhanceFitness, an innovative community-based senior exercise program.                                       | Belza        | 2010 | U.S.        | Older adults                                       | Any organization that provides senior services - program is currently in 19 states and DC                                                                  | Dissemination             | Quantitative | S                 | Y                 | D | Y                   | C | Y                         | D | Y                           | D | N                    | N | Y                      | D | Y                          | D | Y                            | D | Y                          | D | Y                            | D | Y                          | D | Physical activity            |   |         |
| The WellingTONNE challenge toolkit: Using the RE-AIM framework to evaluate a community resource promoting healthy lifestyle behaviours. | Caperchione  | 2010 | Australia   | Applicant organizations                            | Community organizations                                                                                                                                    | Process evaluation        | Quantitative | I&S               | Y                 | D | Y                   | N | Y                         | D | Y                           | C | Y                    | N | Y                      | D | Y                          | C | Y                            | D | Y                          | D | Y                            | D | Y                          | D | Multiple outcomes            |   |         |
| Process evaluation of a school based physical activity related injury prevention programme using the RE-AIM framework                   | Collard      | 2010 | Netherlands | Children aged 10-12 years in Dutch primary schools | Netherland elementary schools                                                                                                                              | Process evaluation of RCT | Qualitative  | I&S               | Y                 | D | N                   | C | Y                         | D | Y                           | D | Y                    | D | Y                      | D | Y                          | D | Y                            | D | N                          | N | N                            | N | N                          | N | Physical activity            |   |         |

**Appendix D.** Summary of all included RE-AIM studies (N=101)

| Title                                                                                                                                      | First Author | Year | Country | Target Population                                         | Study Setting                                          | Study Design    | Methods Used  | Level of Analysis | Reach Assessed? * | Reach Intervened? + | Effectiveness Assessed? * | Effectiveness Intervened? + | Adoption Assessed? * | Adoption Intervened? + | Implementation Assessed? * | Implementation Intervened? + | Maintenance(I)_Assessed? * | Maintenance(I)_Intervened? + | Maintenance(O)_Assessed? * | Maintenance(O)_Intervened? + | Outcome               |
|--------------------------------------------------------------------------------------------------------------------------------------------|--------------|------|---------|-----------------------------------------------------------|--------------------------------------------------------|-----------------|---------------|-------------------|-------------------|---------------------|---------------------------|-----------------------------|----------------------|------------------------|----------------------------|------------------------------|----------------------------|------------------------------|----------------------------|------------------------------|-----------------------|
|                                                                                                                                            |              |      |         |                                                           |                                                        |                 |               |                   | Y                 | D                   | Y                         | D                           | Y                    | D                      | Y                          | D                            | Y                          | D                            | Y                          | D                            | N                     |
| Translation of a dementia caregiver intervention for delivery in homecare as a reimbursable medicare service: Outcomes and lessons learned | Gitlin       | 2010 | U.S.    | Families of dementia patients                             | Fox physical therapy service in 5 mid Atlantic states  | Evaluation      | Quantitative  | I&S               | Y                 | D                   | Y                         | D                           | Y                    | D                      | Y                          | D                            | Y                          | D                            | N                          | N                            | No individual outcome |
| Recruitment for an Internet-based diabetes self-management program: Scientific and ethical implications                                    | Glasgow      | 2010 | U.S.    | T2DM patients at Kaiser Permanente - Colorado             | Outside primary care setting by research staff members | RCT             | Quantitative  | I                 | Y                 | D                   | N                         | N                           | Y                    | D                      | N                          | N                            | N                          | N                            | N                          | N                            | Multiple outcomes     |
| Outcomes of minimal and moderate support versions of an internet-based diabetes self-management support program                            | Glasgow      | 2010 | U.S.    | Adults                                                    | Clinical                                               | RCT             | Quantitative  | I                 | Y                 | D                   | Y                         | C                           | N                    | N                      | Y                          | D                            | N                          | N                            | N                          | N                            | Multiple outcomes     |
| Participation in an ambulatory e-pharmacovigilance system                                                                                  | Haas         | 2010 | U.S.    | Patients receiving a prescription for a target medication | Interactive Voice Response System                      | Cross-sectional | Quantitative  | I                 | Y                 | D                   | N                         | N                           | N                    | N                      | N                          | N                            | N                          | N                            | N                          | N                            | Substance             |
| Implementation of a pilot primary care lifestyle change intervention for families of pre-school children: Lessons learned                  | McKee        | 2010 | U.S.    | Families of pre-school children                           | Urban practices (health centers)                       | RCT             | Mixed Methods | I&S               | Y                 | D                   | Y                         | B                           | Y                    | D                      | Y                          | D                            | N                          | N                            | N                          | N                            | Multiple outcomes     |

**Appendix D.** Summary of all included RE-AIM studies (N=101)

| Title                                                                                                              | First Author | Year | Country   | Target Population                         | Study Setting                                                                       | Study Design                  | Methods Used  | Level of Analysis | Reach Assessed? * | Reach Intervened? + | Effectiveness Assessed? * | Effectiveness Intervened? + | Adoption Assessed? * | Adoption Intervened? + | Implementation Assessed? * | Implementation Intervened? + | Maintenance(I)_Assessed? * | Maintenance(I)_Intervened? + | Maintenance(O)_Assessed? * | Maintenance(O)_Intervened? + | Outcome                |
|--------------------------------------------------------------------------------------------------------------------|--------------|------|-----------|-------------------------------------------|-------------------------------------------------------------------------------------|-------------------------------|---------------|-------------------|-------------------|---------------------|---------------------------|-----------------------------|----------------------|------------------------|----------------------------|------------------------------|----------------------------|------------------------------|----------------------------|------------------------------|------------------------|
|                                                                                                                    |              |      |           |                                           |                                                                                     |                               |               |                   |                   |                     |                           |                             |                      |                        |                            |                              |                            |                              |                            |                              |                        |
| Optimized probability sampling of study sites to improve generalizability in a multisite intervention trial        | Kraschewski  | 2010 | U.S.      | Low-income women                          | NC health departments                                                               | preparation phase 1 of 2-     | Mixed Methods | S                 | N                 | N                   | N                         | N                           | Y                    | D                      | N                          | N                            | N                          | N                            | N                          | N                            | Substance              |
| Step Ahead: A worksite obesity preventive trial among hospital employees                                           | Lemon        | 2010 | U.S.      | Hospital workers                          | Worksite                                                                            | RCT                           | Quantitative  | I                 | Y                 | D                   | Y                         | C                           | Y                    | C                      | Y                          | D                            | N                          | N                            | N                          | N                            | Multiple Outcomes      |
| Smoking cessation for hospitalized smokers: an evaluation of the "Ottawa Model"                                    | Reid         | 2010 | Canada    | Hospitalized smokers                      | Hospitals; small rural community hospitals to large urban academic teaching centers | Quasi-experimental            | Mixed Methods | I                 | Y                 | D                   | Y                         | D                           | Y                    | D                      | Y                          | D                            | N                          | N                            | N                          | N                            | Substance              |
| Coaches' perspectives on implementing an evidence-informed injury prevention programme in junior community netball | Saunders     | 2010 | Australia | Coaches of junior community netball teams | Community                                                                           | Observational / translational | Mixed Methods | I                 | Y                 | D                   | Y                         | B                           | Y                    | D                      | Y                          | D                            | Y                          | D                            | N                          | N                            | No behavioral outcomes |

**Appendix D.** Summary of all included RE-AIM studies (N=101)

| Title                                                                                                                                                | First Author   | Year | Country     | Target Population                               | Study Setting                                                    | Study Design | Methods Used | Level of Analysis | Reach Assessed? * | Reach Intervened? + | Effectiveness Assessed? * | Effectiveness Intervened? + | Adoption Assessed? * | Adoption Intervened? + | Implementation Assessed? * | Implementation Intervened? + | Maintenance(I)_Assessed? * | Maintenance(I)_Intervened? + | Maintenance(O)_Assessed? * | Maintenance(O)_Intervened? + | Outcome                 |
|------------------------------------------------------------------------------------------------------------------------------------------------------|----------------|------|-------------|-------------------------------------------------|------------------------------------------------------------------|--------------|--------------|-------------------|-------------------|---------------------|---------------------------|-----------------------------|----------------------|------------------------|----------------------------|------------------------------|----------------------------|------------------------------|----------------------------|------------------------------|-------------------------|
|                                                                                                                                                      |                |      |             |                                                 |                                                                  |              |              |                   | Y                 | D                   | Y                         | D                           | Y                    | D                      | Y                          | D                            | Y                          | D                            | Y                          | D                            | Y                       |
| Seven-year follow-up of a multiple-health behavior diabetes intervention-HMD                                                                         | Toobert        | 2010 | U.S.        | Post-menopausal women with T2DM at risk for CHD | Primary care clinics                                             | RCT          | Quantitative | I                 | Y                 | D                   | Y                         | D                           | Y                    | D                      | N                          | N                            | Y                          | D                            | N                          | N                            | Multiple outcomes       |
| ¡Viva Bien!: Overcoming recruitment challenges in a multiple-risk-factor diabetes trial                                                              | Toobert        | 2010 | U.S.        | Latinas with T2DM                               | 19 health clinics                                                | RCT          | Quantitative | I                 | Y                 | D                   | N                         | N                           | Y                    | N                      | N                          | N                            | N                          | N                            | N                          | N                            | Multiple outcomes       |
| Exploring the public health impact of an intensive exercise program for patients with rheumatoid arthritis: A dissemination and implementation study | Van der Giesen | 2010 | Netherlands | Rheumatoid arthritis patients                   | Does not explicitly state; assuming each rheumatologist's office | RCT          | Quantitative | I                 | Y                 | D                   | Y                         | D                           | Y                    | D                      | Y                          | D                            | N                          | D                            | Y                          | D                            | Disease self-management |





**Appendix D.** Summary of all included RE-AIM studies (N=101)

| Title                                                                                                                                                                           | First Author | Year | Country | Target Population                                                         | Study Setting                            | Study Design       | Methods Used  | Level of Analysis | Reach Assessed? * | Reach Intervened? + | Effectiveness Assessed? * | Effectiveness Intervened? + | Adoption Assessed? * | Adoption Intervened? + | Implementation Assessed? * | Implementation Intervened? + | Maintenance(I)_Assessed? * | Maintenance(I)_Intervened? + | Maintenance(O)_Assessed? * | Maintenance(O)_Intervened? + | Outcome                 |
|---------------------------------------------------------------------------------------------------------------------------------------------------------------------------------|--------------|------|---------|---------------------------------------------------------------------------|------------------------------------------|--------------------|---------------|-------------------|-------------------|---------------------|---------------------------|-----------------------------|----------------------|------------------------|----------------------------|------------------------------|----------------------------|------------------------------|----------------------------|------------------------------|-------------------------|
|                                                                                                                                                                                 |              |      |         |                                                                           |                                          |                    |               |                   | Y                 | D                   | Y                         | C                           | Y                    | D                      | Y                          | D                            | Y                          | C                            | Y                          | D                            |                         |
| Determining the impact of Walk Kansas: Applying a team-building approach to community physical activity promotion                                                               | Estabrooks   | 2008 | U.S.    | Citizens in Kansas                                                        | Kansas                                   | Pre-post           | Quantitative  | I                 | Y                 | D                   | Y                         | C                           | Y                    | D                      | N                          | N                            | Y                          | C                            | Y                          | D                            | Physical activity       |
| Evaluating initial reach and robustness of a practical randomized trial of smoking reduction                                                                                    | Glasgow      | 2008 | U.S.    | Smokers scheduled for outpatient surgery or an invasive medical procedure | Clinical                                 | RCT                | Quantitative  | I                 | Y                 | D                   | Y                         | C                           | N                    | N                      | Y                          | D                            | N                          | N                            | N                          | N                            | Multiple outcomes       |
| The community health educator referral liaison (CHERL): A primary care practice role for promoting healthy behaviors                                                            | Holtrop      | 2008 | U.S.    | Adult patients with unhealthy behaviors                                   | Primary care practice                    | RCT                | Quantitative  | I                 | Y                 | D                   | Y                         | C                           | Y                    | D                      | Y                          | D                            | N                          | N                            | Y                          | D                            | Multiple outcomes       |
| Translation of effective tai chi intervention into a community-based falls-prevention program                                                                                   | Li           | 2008 | U.S.    | Community-living older adults                                             | Community-based senior service providers | Pre-post           | Quantitative  | I                 | Y                 | D                   | Y                         | C                           | Y                    | D                      | Y                          | D                            | Y                          | D                            | Y                          | D                            | Multiple outcomes       |
| Impact of a print intervention to increase annual mammography screening among Korean American women enrolled in the National Breast and Cervical Cancer Early Detection Program | Maxwell      | 2008 | U.S.    | Korean-American low-income women                                          | Home-based                               | Quasi-experimental | Mixed Methods | I                 | Y                 | D                   | Y                         | D                           | Y                    | D                      | Y                          | D                            | N                          | N                            | Y                          | D                            | Disease self-management |

**Appendix D.** Summary of all included RE-AIM studies (N=101)

| Title                                                                                                                                         | First Author | Year | Country | Target Population                                                                | Study Setting                                                                                    | Study Design | Methods Used  | Level of Analysis | Reach Assessed? * | Reach Intervened? + | Effectiveness Assessed? * | Effectiveness Intervened? + | Adoption Assessed? * | Adoption Intervened? + | Implementation Assessed? * | Implementation Intervened? + | Maintenance(I)_Assessed? * | Maintenance(I)_Intervened? + | Maintenance(O)_Assessed? * | Maintenance(O)_Intervened? + | Outcome                |
|-----------------------------------------------------------------------------------------------------------------------------------------------|--------------|------|---------|----------------------------------------------------------------------------------|--------------------------------------------------------------------------------------------------|--------------|---------------|-------------------|-------------------|---------------------|---------------------------|-----------------------------|----------------------|------------------------|----------------------------|------------------------------|----------------------------|------------------------------|----------------------------|------------------------------|------------------------|
|                                                                                                                                               |              |      |         |                                                                                  |                                                                                                  |              |               |                   | Y                 | D                   | Y                         | C                           | Y                    | C                      | Y                          | D                            | N                          | N                            | Y                          | D                            | N                      |
| From innovation to practices: initiation, implementation and evaluation of a physician-based physical activity promotion programme in Finland | Aittasalo    | 2007 | Finland | Municipal health centers and occupational health care physicians in Finland      | Municipal health centers, occupational health care, private clinics and rehab centers, hospitals | Evaluation   | Quantitative  | I&S               | Y                 | D                   | Y                         | C                           | Y                    | C                      | Y                          | D                            | N                          | N                            | Y                          | D                            | No individual outcomes |
| Evaluating active U: An internet-mediated physical activity program                                                                           | Buis         | 2007 | U.S.    | Faculty, staff, graduate students at University of Michigan during winter months | University of Michigan                                                                           | Evaluation   | Quantitative  | I                 | Y                 | D                   | M                         | C                           | M                    | D                      | Y                          | D                            | N                          | N                            | 3                          | D                            | No individual outcomes |
| Using the RE-AIM framework to evaluate a physical activity intervention in churches                                                           | Bopp         | 2007 | U.S.    | African Methodist churches across South Carolina                                 | African Methodist Episcopal Churches across South Carolina                                       | Evaluation   | Mixed Methods | I&S               | Y                 | D                   | Y                         | C                           | M                    | D                      | Y                          | D                            | Y                          | C                            | Y                          | C                            | Physical activity      |
| Process evaluation of an effective church-based diet intervention: Body & soul                                                                | Campbell     | 2007 | U.S.    | African-American churches                                                        | Churches                                                                                         | RCT          | Mixed Methods | S                 | Y                 | D                   | Y                         | C                           | Y                    | D                      | Y                          | D                            | N                          | N                            | Y                          | D                            | Multiple outcomes      |

**Appendix D.** Summary of all included RE-AIM studies (N=101)

| Title                                                                                                                                                     | First Author | Year | Country   | Target Population                                          | Study Setting                                                                             | Study Design                  | Methods Used  | Level of Analysis | Reach Assessed? * | Reach Intervened? + | Effectiveness Assessed? * | Effectiveness Intervened? + | Adoption Assessed? * | Adoption Intervened? + | Implementation Assessed? * | Implementation Intervened? + | Maintenance(I)_Assessed? * | Maintenance(I)_Intervened? + | Maintenance(O)_Assessed? * | Maintenance(O)_Intervened? + | Outcome                |
|-----------------------------------------------------------------------------------------------------------------------------------------------------------|--------------|------|-----------|------------------------------------------------------------|-------------------------------------------------------------------------------------------|-------------------------------|---------------|-------------------|-------------------|---------------------|---------------------------|-----------------------------|----------------------|------------------------|----------------------------|------------------------------|----------------------------|------------------------------|----------------------------|------------------------------|------------------------|
|                                                                                                                                                           |              |      |           |                                                            |                                                                                           |                               |               |                   | Y                 | D                   | Y                         | C                           | Y                    | D                      | Y                          | D                            | N                          | N                            | N                          | N                            | N                      |
| Resources for health: A primary care based diet and physical activity intervention targeting urban Latinos with multiple chronic conditions               | Eakin        | 2007 | U.S.      | Low income Spanish-speaking people with chronic conditions | Clinica Campesina Family Health Services, a community health center in north urban Denver | RCT                           | Quantitative  | I                 | Y                 | D                   | Y                         | C                           | Y                    | D                      | Y                          | D                            | N                          | N                            | N                          | N                            | Multiple outcomes      |
| Innovation in aged care: Well for Life: Evaluation and policy implications of a health promotion initiative for frail older people in aged care settings. | McKenzie     | 2007 | Australia | Older adults in aged care settings                         | Planned activity groups and residential aged care facilities                              | Observational /Translational? | Mixed Methods | I&S               | Y                 | D                   | M                         | D                           | Y                    | D                      | Y                          | D                            | N                          | N                            | N                          | N                            | No individual outcomes |
| Beyond effectiveness: Evaluating the public health impact of the WISEWOMAN program                                                                        | Farris       | 2007 | U.S.      | Midlife uninsured women in US                              | 14 project sites across North Carolina                                                    | Evaluation                    | Quantitative  | S                 | Y                 | D                   | Y                         | C                           | N                    | N                      | N                          | N                            | Y                          | C                            | N                          | N                            | Other- Blood Pressure  |
| Long-term effects of the Mediterranean lifestyle program: A randomized clinical trial for postmenopausal women with type 2 diabetes                       | Toobert      | 2007 | U.S.      | Post-menopausal women with T2DM                            | Retreat/ Primary care clinics                                                             | RCT                           | Quantitative  | I                 | Y                 | D                   | Y                         | D                           | Y                    | D                      | Y                          | D                            | Y                          | C                            | Y                          | D                            | Multiple outcomes      |

**Appendix D.** Summary of all included RE-AIM studies (N=101)

| Title                                                                                                                                              | First Author        | Year | Country         | Target Population                                    | Study Setting                                                                                 | Study Design    | Methods Used  | Level of Analysis | Reach Assessed? * | Reach Intervened? + | Effectiveness Assessed? * | Effectiveness Intervened? + | Adoption Assessed? * | Adoption Intervened? + | Implementation Assessed? * | Implementation Intervened? + | Maintenance(I)_Assessed? * | Maintenance(I)_Intervened? + | Maintenance(O)_Assessed? * | Maintenance(O)_Intervened? + | Outcome                                    |
|----------------------------------------------------------------------------------------------------------------------------------------------------|---------------------|------|-----------------|------------------------------------------------------|-----------------------------------------------------------------------------------------------|-----------------|---------------|-------------------|-------------------|---------------------|---------------------------|-----------------------------|----------------------|------------------------|----------------------------|------------------------------|----------------------------|------------------------------|----------------------------|------------------------------|--------------------------------------------|
|                                                                                                                                                    |                     |      |                 |                                                      |                                                                                               |                 |               |                   | Y                 | D                   | Y                         | C                           | N                    | N                      | Y                          | D                            | N                          | N                            | N                          | N                            | N                                          |
| Effects of a brief computer-assisted diabetes self-management intervention on dietary, biological and quality of life outcomes                     | Glasgow             | 2006 | U.S.            | Adults                                               | Clinical                                                                                      | RCT             | Quantitative  | I                 | Y                 | D                   | Y                         | C                           | N                    | N                      | Y                          | D                            | N                          | N                            | N                          | N                            | Multiple outcomes                          |
| Robustness of a computer-assisted diabetes self-management intervention across patient characteristics, healthcare settings and intervention staff | Glasgow             | 2006 | U.S.            | T2DM patients in Denver metro area                   | Outside primary care setting by research staff members                                        | RCT             | Quantitative  | I                 | Y                 | D                   | Y                         | C                           | Y                    | D                      | Y                          | D                            | Y                          | D                            | N                          | N                            | Multiple outcomes                          |
| Partial examination of the public health impact of the people with arthritis can exercise (PACE) program: Reach, adoption, and maintenance         | Gyrucik             | 2006 | Canada          | Participants on instructor-training workshops (PACE) | Those beginning a PACEs program                                                               | Cross-sectional | Mixed Methods | S                 | M                 | D                   | N                         | N                           | M                    | D                      | N                          | N                            | N                          | N                            | M                          | D                            | Multiple outcomes                          |
| Adverse outcomes in surgical patients: Implementation of a nationwide reporting system                                                             | Marang-van de Mheen | 2006 | The Netherlands | Surgeons and surgical residents in the Netherlands   | Surgery departments in the Netherlands not including centers for children and private clinics | Cross-sectional | Quantitative  | I&S               | Y                 | D                   | Y                         | D                           | Y                    | D                      | Y                          | D                            | N                          | N                            | Y                          | D                            | Adherence to reporting surgical procedures |

**Appendix D.** Summary of all included RE-AIM studies (N=101)

| Title                                                                                                                                     | First Author | Year | Country | Target Population                                                | Study Setting                                    | Study Design | Methods Used  | Level of Analysis | Reach Assessed? * | Reach Intervened? + | Effectiveness Assessed? * | Effectiveness Intervened? + | Adoption Assessed? * | Adoption Intervened? + | Implementation Assessed? * | Implementation Intervened? + | Maintenance(I)_Assessed? * | Maintenance(I)_Intervened? + | Maintenance(O)_Assessed? * | Maintenance(O)_Intervened? + | Outcome               |
|-------------------------------------------------------------------------------------------------------------------------------------------|--------------|------|---------|------------------------------------------------------------------|--------------------------------------------------|--------------|---------------|-------------------|-------------------|---------------------|---------------------------|-----------------------------|----------------------|------------------------|----------------------------|------------------------------|----------------------------|------------------------------|----------------------------|------------------------------|-----------------------|
|                                                                                                                                           |              |      |         |                                                                  |                                                  |              |               |                   | Y                 | D                   | Y                         | D                           | Y                    | D                      | Y                          | D                            | Y                          | D                            | Y                          | D                            | Y                     |
| Economic analysis of the Mediterranean lifestyle program for postmenopausal women with diabetes                                           | Ritzwoller   | 2006 | U.S.    | Post-menopausal women with diabetes at risk for CHD              | Not reported                                     | RCT          | Quantitative  | I                 | Y                 | D                   | Y                         | D                           | Y                    | D                      | N                          | N                            | N                          | N                            | N                          | N                            | Multiple outcomes     |
| Translational research principles of an effectiveness trial for diabetes care in an urban African-American population.                    | Gary         | 2005 | U.S.    | Urban African American population                                | African Americans in the Baltimore MD urban area | RCT          | Mixed Methods | I                 | Y                 | D                   | Y                         | C                           | Y                    | D                      | Y                          | C                            | Y                          | D                            | Y                          | D                            | No individual outcome |
| Randomized effectiveness trial of a computer-assisted intervention to improve diabetes care                                               | Glasgow      | 2005 | U.S.    | Patients with T2DM                                               | Primary care offices                             | RCT          | Quantitative  | I                 | Y                 | D                   | Y                         | C                           | Y                    | D                      | Y                          | D                            | Y                          | C                            | N                          | N                            | Multiple outcomes     |
| Randomized effectiveness trial of a computer-assisted intervention to improve diabetes care                                               | Glasgow      | 2005 | U.S.    | Patients with T2DM                                               | Primary care offices                             | RCT          | Quantitative  | I                 | Y                 | D                   | Y                         | C                           | Y                    | D                      | Y                          | D                            | Y                          | C                            | N                          | N                            | Multiple outcomes     |
| Effects of the Mediterranean lifestyle program on multiple risk behaviors and psychosocial outcomes among women at risk for heart disease | Toobert      | 2005 | U.S.    | Post-menopausal women with T2DM who are at elevated risk for CHD | Primary care clinics and retreat                 | RCT          | Quantitative  | I                 | Y                 | D                   | Y                         | C                           | Y                    | D                      | N                          | N                            | N                          | N                            | N                          | N                            | Multiple outcomes     |

**Appendix D.** Summary of all included RE-AIM studies (N=101)

| Title                                                                                                                                  | First Author | Year | Country   | Target Population                                           | Study Setting                     | Study Design | Methods Used | Level of Analysis | Reach Assessed? * | Reach Intervened? + | Effectiveness Assessed? * | Effectiveness Intervened? + | Adoption Assessed? * | Adoption Intervened? + | Implementation Assessed? * | Implementation Intervened? + | Maintenance(I)_Assessed? * | Maintenance(I)_Intervened? + | Maintenance(O)_Assessed? * | Maintenance(O)_Intervened? + | Outcome           |
|----------------------------------------------------------------------------------------------------------------------------------------|--------------|------|-----------|-------------------------------------------------------------|-----------------------------------|--------------|--------------|-------------------|-------------------|---------------------|---------------------------|-----------------------------|----------------------|------------------------|----------------------------|------------------------------|----------------------------|------------------------------|----------------------------|------------------------------|-------------------|
|                                                                                                                                        |              |      |           |                                                             |                                   |              |              |                   | N                 | N                   | Y                         | D                           | Y                    | D                      | Y                          | D                            | Y                          | D                            | N                          | N                            | N                 |
| Physical activity promotion in primary care: Bridging the gap between research and practice                                            | Eakin        | 2004 | Australia | General practitioners                                       | Clinics in Rockhampton, Australia | Evaluation   | Quantitative | I&S               | N                 | N                   | Y                         | D                           | Y                    | D                      | Y                          | D                            | Y                          | D                            | N                          | N                            | Physical activity |
| A practical randomized trial to improve diabetes care                                                                                  | Glasgow      | 2004 | U.S.      | Adult T2DM patients from primary care                       | Primary care offices              | RCT          | Quantitative | I                 | Y                 | D                   | Y                         | C                           | Y                    | D                      | Y                          | D                            | N                          | N                            | N                          | N                            | Multiple outcomes |
| Adoption, reach, and implementation of a novel smoking control program: Analysis of a public utility-research organization partnership | Glasgow      | 2004 | U.S.      | Smokers living within 50 miles of Eugene, OR                | Home                              | RCT          | Quantitative | I                 | Y                 | D                   | N                         | N                           | Y                    | D                      | Y                          | D                            | N                          | N                            | Y                          | C                            | Multiple outcomes |
| The D-Net diabetes self-management program: Long-term implementation, outcomes, and generalization results                             | Glasgow      | 2003 | U.S.      | Adult T2DM patients from participating primary care offices | Internet-based                    | RCT          | Quantitative | I                 | N                 | N                   | N                         | N                           | N                    | N                      | Y                          | D                            | Y                          | C                            | N                          | N                            | Multiple outcomes |
| Biologic and quality-of-life outcomes from the Mediterranean lifestyle program: A randomized clinical trial                            | Toobert      | 2003 | U.S.      | _Post-menopausal women with T2DM at risk for CHD            | Retreat/primary care clinics      | RCT          | Quantitative | I                 | Y                 | D                   | Y                         | C                           | N                    | N                      | N                          | N                            | N                          | N                            | N                          | N                            | Multiple outcomes |

**Appendix D.** Summary of all included RE-AIM studies (N=101)

| Title                                                                                                                                           | First Author | Year | Country | Target Population                                                                                    | Study Setting                                | Study Design | Methods Used | Level of Analysis | Reach Assessed? * | Reach Intervened? + | Effectiveness Assessed? * | Effectiveness Intervened? + | Adoption Assessed? * | Adoption Intervened? + | Implementation Assessed? * | Implementation Intervened? + | Maintenance(I)_Assessed? * | Maintenance(I)_Intervened? + | Maintenance(O)_Assessed? * | Maintenance(O)_Intervened? + | Outcome           |
|-------------------------------------------------------------------------------------------------------------------------------------------------|--------------|------|---------|------------------------------------------------------------------------------------------------------|----------------------------------------------|--------------|--------------|-------------------|-------------------|---------------------|---------------------------|-----------------------------|----------------------|------------------------|----------------------------|------------------------------|----------------------------|------------------------------|----------------------------|------------------------------|-------------------|
| Implementation, generalization and long-term results of the "choosing well" diabetes self-management intervention                               | Glasgow      | 2002 | U.S.    | Adults 40 years of age and older with T2DM living near Eugene, OR                                    | Clinical                                     | RCT          | Quantitative | I                 | N                 | N                   | Y                         | C                           | N                    | N                      | Y                          | D                            | N                          | N                            | Y                          | C                            | Multiple outcomes |
| If you build it, will they come? Reach and adoption associated with a comprehensive lifestyle management program for women with type 2 diabetes | Toobert      | 2002 | U.S.    | Postmenopausal women with type 2 diabetes who are at elevated risk for coronary heart disease (CHD). | Primary care clinics; Internet               | RCT          | Quantitative | I                 | Y                 | D                   | N                         | N                           | Y                    | D                      | N                          | N                            | N                          | N                            | Y                          | N                            | Multiple outcomes |
| Promoting smoking abstinence in pregnant and postpartum patients: A comparison of two approaches                                                | Lando        | 2001 | U.S.    | Pregnant women who either smoked currently or had quit recently                                      | Clinical                                     | RCT          | Quantitative | I                 | Y                 | D                   | N                         | N                           | Y                    | D                      | Y                          | D                            | N                          | N                            | Y                          | D                            | Substance         |
| Brief, computer-assisted diabetes dietary self-management counseling: Effects on behavior, physiologic outcomes, and quality of life            | Glasgow      | 2000 | U.S.    | Adults with T2DM 40 years and older                                                                  | Community health center                      | RCT          | Quantitative | I                 | Y                 | D                   | Y                         | C                           | Y                    | D                      | Y                          | D                            | N                          | N                            | N                          | N                            | Multiple outcomes |
| A brief smoking cessation intervention for women in low-income planned parenthood clinics                                                       | Glasgow      | 2000 | U.S.    | Women aged 15 to 35 who attend Planned Parenthood clinics for non-pregnancy related visits           | 4 Planned Parenthood clinics in Portland, OR | RCT          | Quantitative | I                 | Y                 | D                   | Y                         | C                           | Y                    | D                      | Y                          | D                            | Y                          | C                            | N                          | N                            | Multiple outcomes |

**Appendix D.** Summary of all included RE-AIM studies (N=101)

| Title                                                                                        | First Author | Year | Country | Target Population | Study Setting                                                          | Study Design | Methods Used | Level of Analysis | Reach Assessed? * | Reach Intervened? + | Effectiveness Assessed? * | Effectiveness Intervened? + | Adoption Assessed? * | Adoption Intervened? + | Implementation Assessed? * | Implementation Intervened? + | Maintenance(I)_Assessed? * | Maintenance(I)_Intervened? + | Maintenance(O)_Assessed? * | Maintenance(O)_Intervened? + | Outcome   |
|----------------------------------------------------------------------------------------------|--------------|------|---------|-------------------|------------------------------------------------------------------------|--------------|--------------|-------------------|-------------------|---------------------|---------------------------|-----------------------------|----------------------|------------------------|----------------------------|------------------------------|----------------------------|------------------------------|----------------------------|------------------------------|-----------|
|                                                                                              |              |      |         |                   |                                                                        |              |              |                   | Y                 | D                   | N                         | N                           | N                    | N                      | N                          | N                            | N                          | N                            | N                          | N                            | N         |
| Reaching those most in need: Participation in a Planned Parenthood smoking cessation program | Eakin        | 1999 | U.S.    |                   | 3 Planned Parenthood clinics in the Portland, Oregon metropolitan area | RCT          | Quantitative | I                 | Y                 | D                   | N                         | N                           | N                    | N                      | N                          | N                            | N                          | N                            | N                          | N                            | Substance |

Level of Analysis: I= Individual; S= Setting; I&S= Combination of Individual and Setting; IWS= Individuals Clustered within Setting; \* Assessment Variables: N= Not reported; Y= Accurately reported; M= Misreported; + Intervening Variables: N= Dimension not included in article; D= Described; C= Changed; B= Described and Changed
